# Supplementary material for: Designing transition metal and nitrogen-codoped SrTiO3(001) perovskite surfaces as efficient photocatalysts for water splitting
Source: Royal Society of Chemistry journal article supplement (doi:10.1039/c7se00219j), 2017-01-01
Supplement: c7se00219j1.pdf [file c7se00219j1.pdf]

# Supporting Information

## **Designing Transition Metal and Nitrogen Codoped SrTiO<sub>3</sub>(001) Perovskite Surfaces as Efficient Photocatalysts for Water Splitting**

Yang Yang<sup>+</sup>, Weijie Zheng<sup>+</sup>, Daojian Cheng<sup>1,2,\*</sup>, and Dapeng Cao<sup>1,2,\*</sup>

<sup>1</sup>State Key Laboratory of Organic-Inorganic Composites, Beijing University of Chemical  
Technology, Beijing 100029, People's Republic of China

<sup>2</sup>Beijing Advanced Innovation Center for Soft Matter Science and Engineering,  
Beijing University of Chemical Technology, Beijing 100029, People's Republic of China

---

<sup>+</sup> Equally contributed to this work

<sup>\*</sup> Corresponding Authors. Email: [chengdj@mail.buct.edu.cn](mailto:chengdj@mail.buct.edu.cn) or [caodp@mail.buct.edu.cn](mailto:caodp@mail.buct.edu.cn)

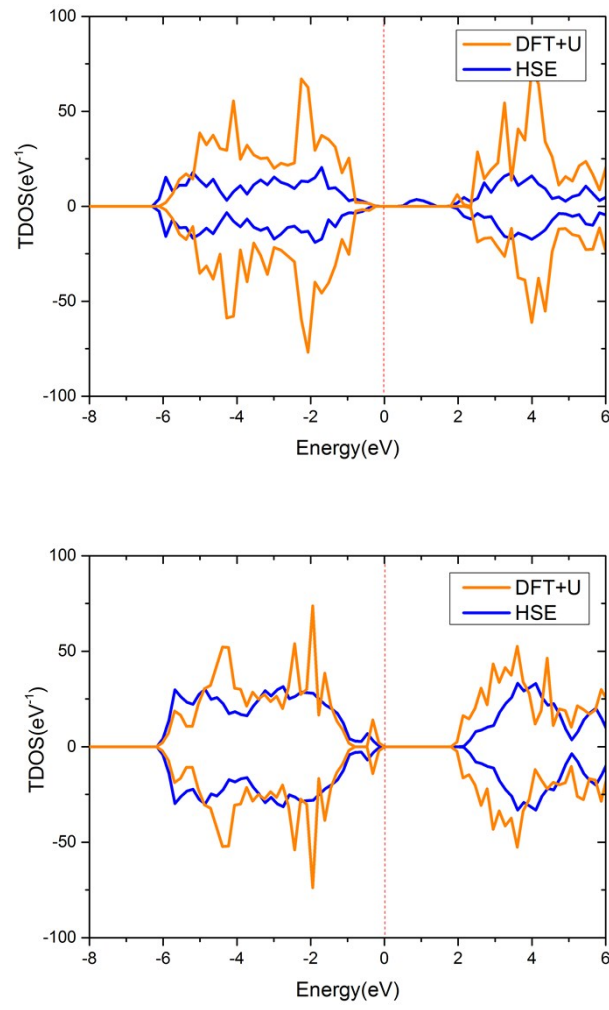

**Figure S1.** The DOS of V doped (a) and N-Nb codoped (b) SrTiO<sub>3</sub>(001) surfaces calculated by DFT+U and HSE.

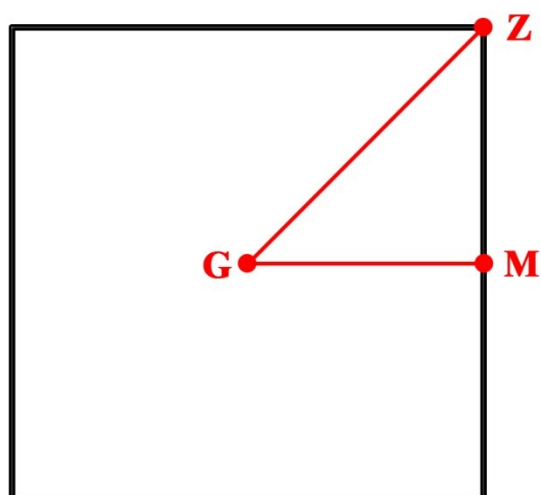

**Figure S2.** Schematic illustration of the symmetry points G, M, Z on  $\text{SrTiO}_3(001)$  surface.
